# Supplementary material for: Additions to the phylogeny of colubrine snakes in Southwestern Asia, with description of a new genus and species (Serpentes: Colubridae: Colubrinae)
Source: PubMed Central journal article supplement (PMC7182026; doi:10.7717/peerj.9016), 2020-04-21
Supplement: peerj-08-9016-s005.pdf [file peerj-08-9016-s005.pdf]

## NEWLY OBTAINED mtDNA SEQUENCES OF COLUBRID SNAKES

>MN531564\_Hierophis\_andreanus\_ICSTZM.7H.1154\_ND4

ATCCAAACACAATGAAGCCTCTCAGGCGCCATAGCCCTAATAATCGCCCACGGATTCACCTTCTCAGCACTTTTTTG  
TCTAGCCAATACCACCTATGAACGAACCAAACTCGAATTATGATTCTCACACGAGGATTCACAACATCTTACCAA  
TACTAACAACTGGTGACTACTAACTAACCTTATAAATATTGCAACCCACCAAGCATAAATTTTACAGGAGAACTA  
CTAATCGTATCATCACTATTCAACTGATGTCCACAACAATCATTATATTCGGACTGTCAATACTTATCACAGCATCA  
TACTCACTGCACATATTCCTATCAACACAAATAAACACACCCCGCATTAAAGTACTACAACACAACCAACACATTACG  
CGAACATCTGACTATAACTCCACATTATCCCCTAATCCTAATCTCATTAAAACCAGAGCTAGTTATT

>MN531565\_Hierophis\_andreanus\_ICSTZM.7H.1154\_CYTB

CACACACTAATACTATTCAACCTCCTACCAGTAGGATGCAACATCTCAACCTGATGAAACTTCGGATCCATGCTATT  
AACCTGCTCAACCTACAAATCCTTACTGGCTTCTTTCTAGCTATTCACTATACAGCCAACATCAACTTACCCTTCTCA  
TCTATCGTACATATTACACGAGACGTACCCTACGGATGAATAATACAAAACCTTCATGCAATTGGCGCATCTATATT  
CTTCATCTGTATCTACATCCACATTGCTCGAGGACTTTACTACGGATCTTACCTAAATAAAAATGTGTGATTATCAG  
GAGTTACCCTAATAATTATTCTCATAGCAACAGCCTTCTTCGGATATGTATTACCCTGAGGACAAATATCATTCTGA  
GCAGCAACAGTAATTACTAATCTACTAACAGCTATCCCATATATTGGCACAACACTAACTACATGGTTGTGAGGCG  
GATTCTCAATCAATGACCCGACCCTAACCCGATTCTTTGCCCTACACTTCATCCTACCATTTACCATTATCTCCATATC  
TTCAATCCATATCATACTCCTACATACAGAGGGATCTAGTAACCCACTAGGAACAAACTCAGATATCGACAAAATCC  
CATTTACCCCTACCCTCCTATAAAGACGCTATAATACTTACCACCATAATAACAGCACTGTTCTAATCATATCAT  
TCACCCAGATATCTTCAATGACCCAGAAAACCTTCTCAAAGCCAACCCCTAGTAACACCACAACACATCAAACCA  
GAATGATACTTCTATTTGCCTATGGAATCCTACGATCAATTCCAAACAAATTGGGCGGAACAATAGCTCTTATACT  
CTCCGTAGCAATTCTACTAACAGCACCTATACCCACACCTCACACCTCCGCCCCATAACATTTCCGCCACTAATACA  
ACTAAAATTCTGAACCCTAGTTGCTACATTTATACAATTACATGAACAGCCACTAAACCAGTAGAACACCACCTTT

>MN536808\_Hierophis\_andreanus\_ICSTZM.7H.1154\_12S

ATTAATCCAACCCCCCTAGCCTAACAGTCTATATACCGCCGTCGCCAGCATACCTTCTGAAAGAAATAAAGTAAGC  
TAAACAGTTACCACACTAACACGACAGGTGAGGTGTAATAATGGGCGGGTCAAGATGGGCTACATTTTCTAAA  
ATAGAAAATACGAACTAACTATGAAAAAGAACTGAAGGCGGATTTAGCAGTAAATTAAGGACATAATACTTAA  
TCGAAATTAATGCAATGAGGTGCGTACACACCCGCCGTC

>MN531566\_Persiophis\_fahimi\_ICSTZM.7H.1151\_ND4

TGAAGCCTATCAGGCGCCATAGCCCTAATAATCGCCCACGGATTCACCTTCTCAGCACTTTTTCTGCCTAGCCAACAC  
CACCTATGAACGAACTAATACTCGTATCATAATTCTTACAGGAGGATTCACAATATTTTACCAATACTAACAACCT  
GATGACTACTAACCAACCTAATAAACATTGCAACACCACCCAGCATAAACTTACCCGGGAACTATTAATCGCCTC  
ATCACTATACAACTGATGCCAGCAACAATCATCATATTCGGACTCTCAATACTTATCACAGCATCCTACTCTCTACA  
TATACTCTTATCAACACAACTGGAACACCCTACTAACTCAATAACACACCCAACACACTCACGAGAACATCTCC  
TAATAACGCTCCACATTATACCACTAATACTTATCTCTCTCAAACCAGAACTAATCTTT

>MN531567\_Persiophis\_fahimi\_ICSTZM.7H.1151\_CYTB

ATACTCATACTATTTAACCTACTCCCAGTAGGATCAAACATTTCAACATGATGAAATTTCCGGATCCATACTACTAACC  
TGCTCTGCCCTACAAATTATGACCGGATTCTTCTAGCCATCCACTATACAGCCAACATCAATCTCGCCTTCTCATCT  
GTTATCCACATCACACGAGATGTGCCATATGGATGAACTATACAAAATCTACATGCAATCGGCGCATCCATTTTTT  
CATCTGCATCTATATCCACATCGCACGTGGACTATACTACGGATCCTACCTAATAAAAATGTGTGACTATCAGGAA  
CTATCCTACTAATTATCCTAATAGCAACAGCCTTCTTCGGCTACGTACTACCATGAGGACAAATATCATTCTGAGCC

GCAACAGTAATCACTAACCTACTAACAGCCCTCCCATATGTTGGCACAATACTAACCCACCTGATTATGGGGGGTT  
TCTCAATTAATGACCCCACTCTAACCCGATTCTTTGCCCTCCACTTCATCTTACCATTACCATTATCTCAATATCTTC  
AATCCATATTATACTTCTACACACAGAAGGCTCCAGCAACCCCTAGGAACAACTCAGACATTGATAAAATCCCAT  
TTCACCCATACCCTCCATAAAGATCTCCTTATACTAACCATCATAATCACTGCACTATTACCATTATATCATTAC  
CCCAGACATATTCAATGACCCAGAAAATTCTCAAAGCCAACCCCTGGTAACACCACAACACATCAAACCAGAG  
TGATATTTCTGTTTGCCTACGGAATCCTTCGATCTATCCAAATAAGCTGGGAGGAACCATAGCCCTAGTTATATC  
CGTAATAATCCTAATAACAATACCATTACACACACCTCACACATACGACCAATAACTTTCCGCCCCCTAGCACAAC  
TAAAATTTTGAACCTTAGTAGCTACATTCATCACAATTACGTGAGCAGCCACCAAACCAGTAGAACCTCCATTAC

>MN536809\_Persiophis\_fahimi\_ICSTZM.7H.1151\_12S

TAGATACCCCACTATGCCTAACTGTAACCCAACAATTAATACCAATTGTTCCGCAAATAACTACGAGTAAAACT  
TAAAATTTAAAGACTTGACGGTACTTCACAACACCCTAGAGGAGCCTGTCCAGTAACCGATACTCCACGATCAAC  
CCAACCTTTCTAGCCCAACAGTCTATATACCGCCGTCGCCAGCCTACCTTATGAAAGAAACAAAGTAAGCCAAAT  
AGTCACACACTAACACGACAGGTGCGAGGTGTAACCAATGAAGGGGGCAAAGATGGGCTACTCTCTAACGCAG  
AGAACACGAATAAACTTTGAAATAAGAACTGAAGGTGGATTTAGCAGTACACTAAGAACAACATACTTGGTCCG  
AAATTAATGCAATGAAGTGCCTACACACCGCCCGTC

#### **NEWLY OBTAINED nuDNA SEQUENCES OF *Persiophis fahimi***

>MT163746\_Persiophis\_fahimi\_ICSTZM.7H.1151\_RAG2

GTTAATGTGGTTCACAGTCTAGGCAAAAGTATGATAGCTATAATTGGGGGACGATCTTACATAGCTCTTGGACAGA  
GGACAACGAAAAATGGAATAGTGTGGTTGACTGTATGCCACATATATTTCTGGTTGACCCTGAATTCGGATGTTG  
TACTTCATATGCTCTCCAGAATTTTCAAGATGGCTTTTCTTTTCATCTCTCTTGTCCAAAATGATATCATCTATATC  
ATAGGAGGACATTCCTGGAAAATAATATCAGACCTCCCAATTTCTATAAAAATAAAAATTGATCTTCCCTTAGGCAG  
TCCAGCTGTGAGCTGTGTAATTTTGCCTGGAGGAATCTCGGTCTCCAGTGCCATCATGACACAGACCAGAGAAAA  
GGAATTTGTTGTTGTAGGAGGTTACCATTCTGACAACCAGAAAAGGATGATCTGTAATACTATCAACCTAGATGAT  
AACAAAATAGAGATAGTGGAAACAGAGACACCAGAATGGACTCCAGATATCAAGCACTGCAAGACATGGTTTGG  
GAGTGATATGGGAAATGGATCCATTTTATTTGGTATACCAGGAGACAATAGGCAGCTGACTTCAGATGCAAACATA  
TTTCTACATATTAATGTCAAGTAGAAAATGGTCAGAGCTTAGAACAGATGGCACAAGTATGTAGTCAGAGCTCT  
ACAGAAGATGCTGGAGAGTCCACTCCTTTT

>MT163747\_Persiophis\_fahimi\_ICSTZM.7H.1151\_NT3

CTGGCTTTTCTCTGTGGCATCCAATCGACCAGCATGGACCAAGGGAGTTTATCAGAAGATTCCATGAATTCCTTCT  
TAAAACATTGATTCAAGCTGGCATTGGAACCAAGCAGACGGCCAGAACTAAAGACGGCGCGCAACCACAGT  
GAAGAAAACCGAGGTGGAACCAGAGTTGACTACAAGCCAAGATATTCGATTGGGTTTCCAGCCCGTTGTTTCGTT  
GGATGCAGAATTAAGGAGCAGAGACGTTTTCAGTTCTCCACGGTCTCCTGAGTGAATAACCCCTGGA  
ACCCCTCCTTTGTATCTGATGGAGGAGCCCATGGTGCTGAACCGAACGTCTCGCCGGAAGAGGTATACTGAAGG  
GAAAACCTACCGCGGGGAATATTCCGTGTGCGACAGCGAGAGCCGATGGGTACCGGACAAAACGTCCGCTGTGG  
ACATCCGAGGACACCAGGTGACTGTCCTGGGTGAAATCCGAATGGGCCATCTCCGGTCAAACAATATTTTACGA  
AACGAGATGTAAGCAAGCCAAGCCTGCCAAGAGCGGTTGTCTGGTATCGACGACAAACACTGGAATCCCAAGTG  
CAAAACCTCACAAACATTTGTGCGCGCA

>MT163748\_Persiophis\_fahimii\_ICSTZM.7H.1151\_CMOS

GAAAAGTTCTTTGGGGTGGGAAGCGTGTCTAGGATTCGTGCGCTACCCCCCACTTAGCTTGGTGTCAATCGACT  
GGGATCAGTTATGTCTCCTGCATCTCCTCGGCTCTGGTGGGTTTGGTTCTGTTTACAAGGCAACTTACCATGGAGCT  
ACAGTGGCTGTAAAACAAGTGAAGAGATGTAGTAAAAACATTTGGCATCACGGCAAAGCTTCTGGGCAGAACTA  
AATGTAGCACGTCTTGACCATAACAATGTGGTACACATAGTAGCTGCTAGCACATGTACCCCTACTAGTCAGGATA  
GTTTGGGTACCATAATTATGGAATATGCAGGTAAGTGCCTCTACATCACATTATCTATGGGACTGGTTATTTAACA  
GGAAATAATGATGGCCTTATATGTGACCATGGGTTTTTGGAGTACAGCTCAGGCTGTCATTTACTCCTATGATATTGT  
GGCAGGATTAATGTTTCTCCATTCTCAGTTAATTGTGCATCTGGATTTAAACCTGCTAACATATTCATAACAGAAC  
ATAATGTTTGTAAAGATTGGAGACTTTGGATGCTCCAAAAGCTAGAAGATAGCATATCTTCAGGACGACATCTTTG  
TCATCAAGGGGGAACATACACACATCGTGCTCCTGAACTTCTTAAAGGTGAGAAAATCACACCCAAG

>MT163749\_Persiophis\_fahimii\_ICSTZM.7H.1151\_BDNF

AGTTGCATGAAAGCTGCCCCATGAAGGAAGTTAGTATCAGAGGACAAGGCAGCTTGGCTTATCCTGGTCTTCGG  
ACACAGGGAAATCTGGAGACCCTCAGTGGGCCCAATGATGCCACCAGAGGATTAACATCTTTGGCAGACACTTTT  
GAACATGTCATTGAGGAGCTCCTGGATGAGCAGCAGGTCATTCAACCCAGCAAGGAAAATAAGGATGCAGACTT  
GTACTCATCACGGGTGATGCTAAGCAGTCAAGTGCCTTTGGAGCCTCCTCTGCTTTTCTGCTCGAGGAGTATAAA  
AACTACTTGGATGCCGCAAACATGTCCATGAGGGTCCGGCGCCATTCTGACCCTGCTCGCCGTGGGGAGCTGAGT  
GTGTGTGACAGTACTAGTGTGGTGTGACAGCAGCTGAAAAAAGACTGCAGTAGACATGTCCGGAGCAACAGT  
TACAGTCTTGAAAAAGTCCCAGTGCCCAAAGGCCAACTGAAGCAATATTTTTATGAGACCAAGTGCAGCACGAA  
GGGTTATGCAAAGAAGGCTGTAGGGGCATAGACAAGAGGTACTGGAATCCCAGTGCCGAACTACTCAGTCTTA  
CGTCCGCGCTCTCACCATGGATAACAAAAGAGAGTTGGATGGCGCTTTATAAGAATAGACACTTCCTGT
